# Supplementary material for: Transmission of Equine Influenza Virus during an Outbreak Is Characterized by Frequent Mixed Infections and Loose Transmission Bottlenecks
Source: PubMed Central journal article supplement (PMC3534375; doi:10.1371/journal.ppat.1003081), 2012-12-20

Figure S4.

A.

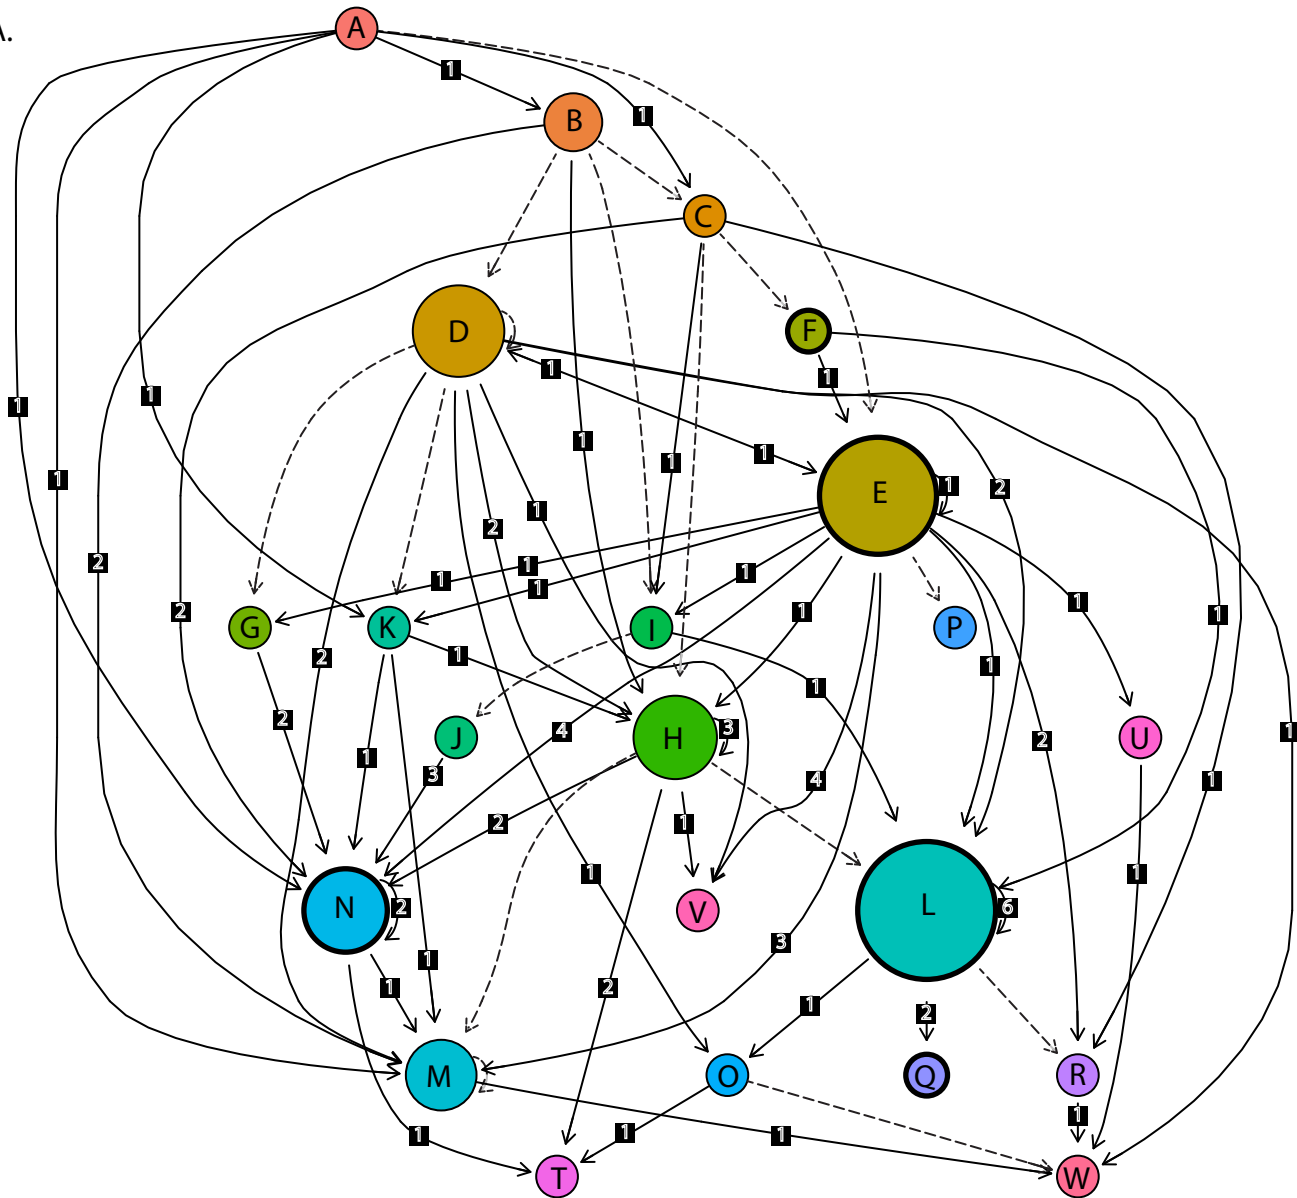

B.

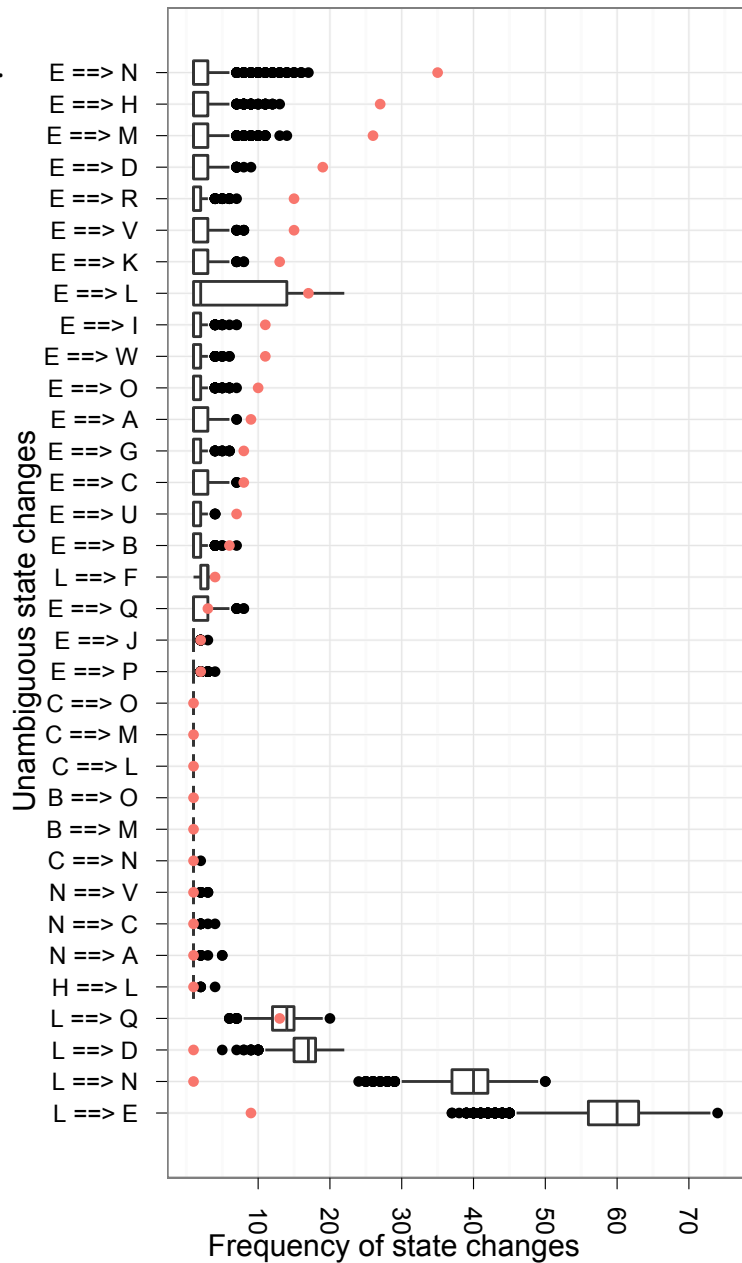

Supplement: ppat.1003081.s009.pdf [file ppat.1003081.s009.pdf]
